# Supplementary material for: Replicating the post-chemotherapy tumor microenvironment via biomimetic scaffolds to regulate MSC differentiation
Source: Royal Society of Chemistry journal article supplement (doi:10.1039/d6ra01031h), 2026-03-27
Supplement: d6ra01031h1.pdf [file d6ra01031h1.pdf]

## Support information

### Recapitulating the post-chemotherapy tumor microenvironment via biomimetic scaffolds to regulate MSC differentiation

Zhe Fan,<sup>a,d,e</sup> Huiying Zhang,<sup>b</sup> Lulu Wang,<sup>c</sup> Jinxiang Tian,<sup>\*a</sup> Huaiqing Jiang,<sup>d</sup> Yazhou Chen,<sup>\*d</sup> Biao Guo,<sup>\*a</sup> Haiyang Yu,<sup>\*a</sup>

<sup>a</sup> Department of Orthopedics, Affiliated Fuyang People's Hospital of Anhui Medical University, National Key Clinical Specialty, Clinical Research Center for Spinal Deformity of Anhui Province, Fuyang, Anhui Province 236000, China.

<sup>b</sup> Henan Provincial Chest Hospital, The Chest Hospital of Zhengzhou University, Zhengzhou 450006, China.

<sup>c</sup> Department of Plastic Surgery, The Third People's Hospital of Henan Province, Zhengzhou 450007, Henan, China.

<sup>d</sup> Henan Institute of Advanced Technology, Zhengzhou University, Zhengzhou 450003, PR China.

<sup>e</sup> Department of Orthopedic Surgery, The First Affiliated Hospital of Zhengzhou University, Zhengzhou 450042, China.

**\*Corresponding Author**

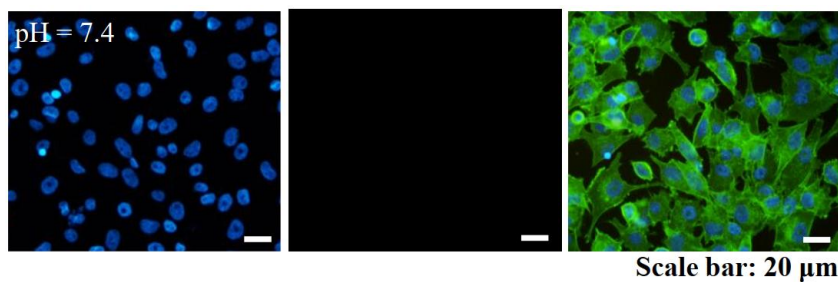

**Figure S1.** Fluorescence microscopic observation on the intracellular distribution of DOX in the MG63 cells after incubation with PLGA-collagen scaffold for 12 hours. Cell nucleus represented blue fluorescence; DOX represented red fluorescence; Actin cytoskeleton represented green fluorescence.

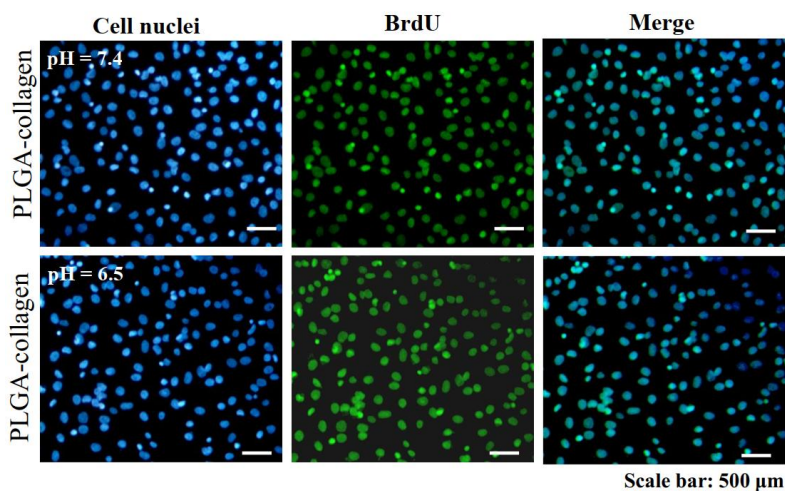

**Figure S2.** BrdU staining of MG63 upon treatment of PLGA-collagen at pH 7.4 or pH 6.5. Cell nucleus: blue fluorescence; BrdU: green fluorescence.

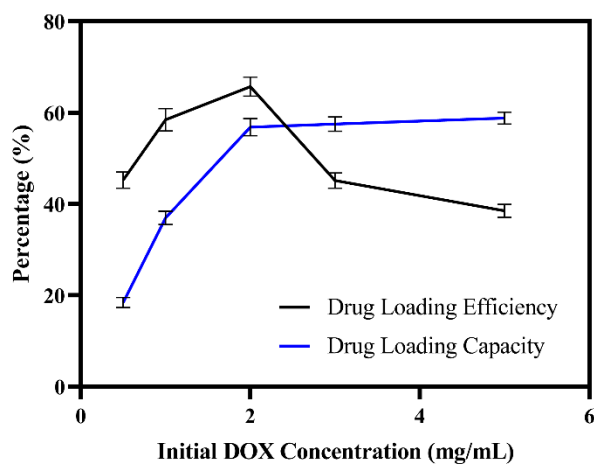

**Figure S3.** Optimization of doxorubicin (DOX) loading into mesoporous silica nanoparticles (MSNs). The quantitative curves depict the drug loading efficiency (DLE, black line) and drug loading capacity (DLC, blue line) at various initial DOX concentrations against a fixed MSN dispersion (1.0 mg/mL). Data are presented as mean  $\pm$  SD (n = 3)

Table S1. Primers and probes for real-time PCR analysis.

| mRNA         | Description                              | Oligonucleotide                                                                                                         |
|--------------|------------------------------------------|-------------------------------------------------------------------------------------------------------------------------|
| <i>GAPDH</i> | glyceraldehyde-3-phosphate dehydrogenase | Hs99999905_m1                                                                                                           |
| <i>RUNX2</i> | Runt-related transcription factor-2      | Hs00231692_m1                                                                                                           |
| <i>ALP</i>   | Alkaline phosphatase                     | Forward 5'-GACCCTTGACCCCAACAAT-3'<br>Reverse 5'-GCTCGTACTGCATGTCCCT-3'<br>Probe 5'-TGGACTACCTATTGGGTCTCTTCGAGCCA-3'     |
| <i>IBSP</i>  | Bone sialoprotein 2                      | Forward 5'-TGCCTTGAGCCTGCTTCC-3'<br>Reverse 5'-GCAAAATTAAGCAGTCTCAITTTG-3'<br>Probe 5'-CTCCAGGACTGCCAGAGGAAGCAATCA-3'   |
| <i>SPPI</i>  | Secreted phosphoprotein 1                | Forward 5'-CTCAGGCCAGTTGAGCC-3'<br>Reverse 5'-CAAAAGCAAATCACTGCAATTCTC -3'<br>Probe 5'-AAACGCCGACCAAGGAAAACACTACTACC-3' |

Table S2. Characterization of DOX loading capacity and efficiency in MSNs.

| Initial DOX Concentration (mg/mL) | MSN Dispersion (mg/mL) | Weight of Loaded DOX (mg) | Drug Loading Efficiency (DLE, %) | Drug Loading Capacity (DLC, %) |
|-----------------------------------|------------------------|---------------------------|----------------------------------|--------------------------------|
| 0.5                               | 1                      | 0.2                       | 45.2 $\pm$ 1.8                   | 18.4 $\pm$ 1.1                 |
| 1                                 | 1                      | 0.6                       | 58.4 $\pm$ 2.5                   | 36.9 $\pm$ 1.5                 |
| 2                                 | 1                      | 1.3                       | 65.7 $\pm$ 2.1                   | 56.8 $\pm$ 1.9                 |
| 3                                 | 1                      | 1.4                       | 45.1 $\pm$ 1.7                   | 57.5 $\pm$ 1.6                 |
| 5                                 | 1                      | 1.4                       | 38.5 $\pm$ 1.4                   | 58.8 $\pm$ 1.3                 |
